# Supplementary material for: Metabolomic biomarkers in vitreous humor: unveiling the molecular landscape of diabetic retinopathy progression
Source: Springer Nature journal article supplement (doi:10.1186/s40942-025-00682-5), 2025-05-22
Supplement: MOESM1 [file 40942_2025_682_MOESM1_ESM.pdf]

Table S1. Indications for Vitrectomy.

*CTRL = controls without diabetes or retinopathy; DIA = patients with diabetes and no retinopathy; NPDR = patients with non-proliferative diabetic retinopathy; PDR = patients with proliferative diabetic retinopathy; DM = diabetes mellitus; VEGF = vascular endothelial growth factor.*

| INDICATION                         | CTRL | DIA | NPDR | PDR |
|------------------------------------|------|-----|------|-----|
| Macular hole                       | 3    | 2   | 0    | 0   |
| Epiretinal membrane                | 3    | 0   | 2    | 4   |
| Symptomatic vitreomacular traction | 0    | 3   | 1    | 2   |
| Non-clearing vitreous opacities    | 0    | 0   | 1    | 1   |
